# Supplementary material for: cNEK6 induces gemcitabine resistance by promoting glycolysis in pancreatic ductal adenocarcinoma via the SNRPA/PPA2c/mTORC1 axis
Source: Springer Nature journal article supplement (doi:10.1038/s41419-024-07138-y), 2024-10-11

## **Supplementary Figure Legends**

### **Supplementary FIG. 1.**

**A.** Volcano diagram of differentially expressed genes (DEGs) in the indicated gene set. **B.** Schematic representation of the genomic region of cNEK6 and its cyclization. **C.** Agarose gel electrophoresis images showing the amplification of cNEK6 and NEK6 in both complementary (cDNA) and genomic DNA (gDNA) from PANC-1 and PaTu8988t cells using convergent (blue) and divergent (red) primers. **D.** Agarose gel electrophoresis shows the expression of cNEK6 and NEK6 after RNase R treatment of PANC-1 and PaTu8988t cells. **E.** Curves of fluorescence intensities at the position marked by a white line in the merged image in Figure 1D. **F.** cNEK6 RNA levels in gemcitabine-resistant groups (PANC-1 GR and PaTu8988t GR) transfected with sh-NC or sh-cNEK6, and in their control groups (PANC-1 WT and PaTu8988t WT) after transfection with OE-Vector or OE-cNEK6 (n = 3).

### **Supplementary FIG. 2.**

**A.** DEGs between OE-cNEK6 and OE-Vector PANC-1 cells. **B.** GSEA based on DEGs between OE-cNEK6 and OE-Vector PANC-1 cells. **C.** Statistical analysis of colony formation is shown in Figure 2G.

### **Supplementary FIG. 3.**

**A.** IRES elements in cNEK6 predicted using the CircBANK database ([www.circbank.cn/](http://www.circbank.cn/)). **B.** The most potent binding protein of cNEK6 predicted using the RBPDB database ([rbpdb.ccbr.utoronto.ca/](http://rbpdb.ccbr.utoronto.ca/)). **C.** mRNA levels of SNRPA in PANC-1 GR cell lines, and PANC-1 WT cells, transfected with sh-cNEK6 and OE-cNEK6, respectively (n = 3).

#### **Supplementary FIG. 4.**

**A.** Changes in SNRPA protein levels measured in Figure 4A were quantified using line charts (n = 3). **B.** Changes in SNRPA protein levels measured in Figure 4B were quantified using line charts (n = 3). **C.** Ubiquitination of SNRPA in gemcitabine-resistant (PANC-1 GR and PaTu8988t GR) and control groups (PANC-1 WT and PaTu8988t WT) transfected with sh-cNEK6 and OE-cNEK6, respectively. Western blot analysis was performed using antibodies against K63-Ub.

#### **Supplementary FIG. 5.**

**A.** mRNA levels of deubiquitinases in PANC-1 GR cell lines and control PANC-1 WT cells transfected with sh-cNEK6 and OE-cNEK6 (n = 3). **B.** Potential ubiquitin E3 ligases of SNRPA predicted in the UbiBrowser database ([ubibrowser.ncpsb.org.cn](http://ubibrowser.ncpsb.org.cn)). **C.** Protein levels of BTRC under the treatment of OE-cNEK6 or sh-cNEK6. **D.** mRNA levels of BTRC under the treatment of OE-cNEK6 or sh-cNEK6 (n = 3). **E-F.**

Potential binding sites of SNRPA in cNEK6 (E) and cNEK6 in SNRPA (F) were predicted using the catRAPID database ([s.tartaglialab.com/page/catrapid\\_group](http://s.tartaglialab.com/page/catrapid_group)). **G.** Potential ubiquitination sites regulated by BTRC in SNRPA were predicted using the UbiBrowser database. **H.** Effect of wild-type or mutant SNRPA on cNEK6-induced changes in glucose uptake, pyruvate levels, lactate production, and ATP levels in PANC-1 GR cell lines (n = 3).

#### **Supplementary FIG. 6.**

**A.** mRNA levels of PP2Ac in OE-Vector/OE-cNEK6 PANC-1 WT cells transfected with or without sh-SNRPA and in sh-NC/sh-cNEK6 PANC-1 GR cells transfected with or without SNRPA. **B.** Changes in PP2Ac protein levels measured in Figure 6E were quantified using line charts (n = 3). **C.** Changes in PP2Ac protein levels measured in Figure 6F were quantified using line charts (n = 3). **D.** Changes in PP2Ac protein levels measured in Figure 6G were quantified using line charts (n = 3). **E.** Changes in the PP2Ac protein levels measured in Figure 6H were quantified using line charts (n = 3).

#### **Supplementary FIG. 7.**

**A.** cDNA of the plasma cNEK6 and GAPDH was transcribed with random 6-mer or oligo (dT) primers and then detected by qRT-PCR

67 (n = 3). **B.** Effect of rapamycin on OE-cNEK6 induced changes in ECAR  
68 in PANC-1 WT cell lines (n = 3). **C.** Effect of rapamycin on OE-cNEK6  
69 induced changes in glucose uptake, pyruvate levels, lactate production,  
70 and ATP levels in PANC-1 WT cell lines (n = 3). **D.** Tumor growth in  
71 orthotopic models of nude mice treated with the IgG or anti-SNRPA  
72 (n = 5). **E.** Tumor growth in orthotopic models of nude mice treated with  
73 the Trehalose or PP2Ac recombinant proteins (n = 5). **F-H.** The effects of  
74 rapamycin (F), anti-SNRPA (G), and PP2Ac recombinant proteins (H), on  
75 the expression of SNRPA, PP2Ac, and mTORC1 relative pathway.  
76



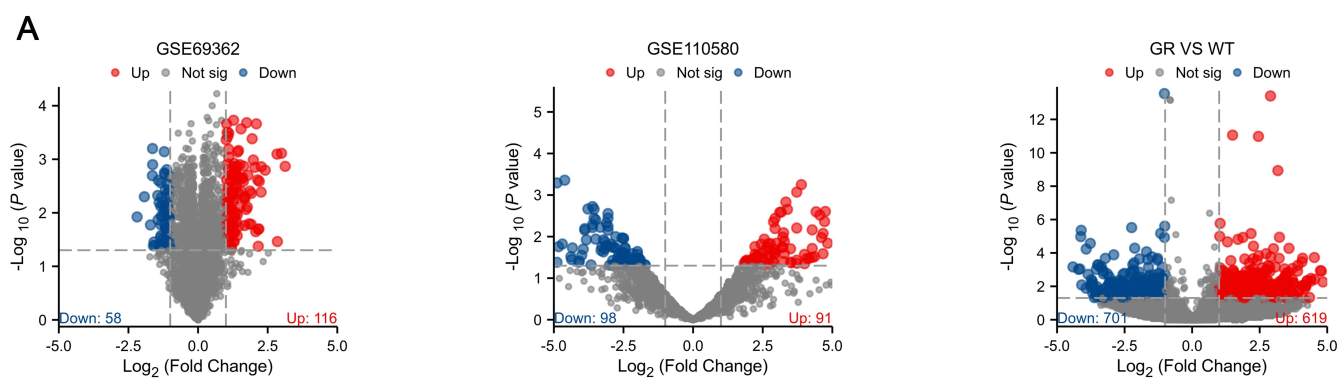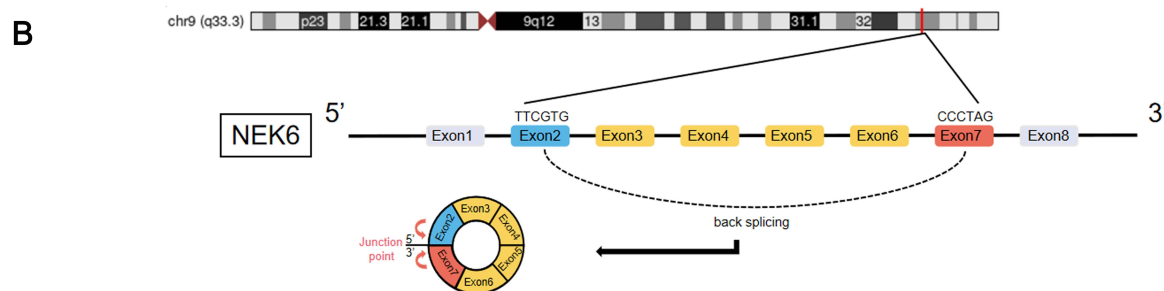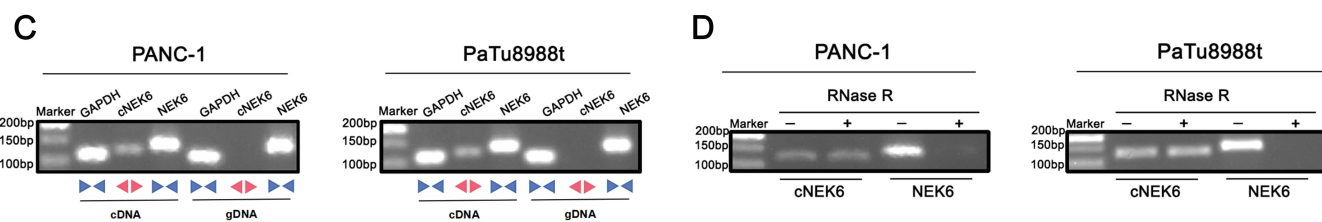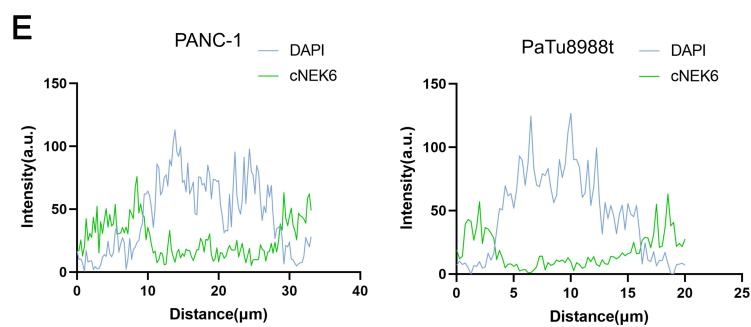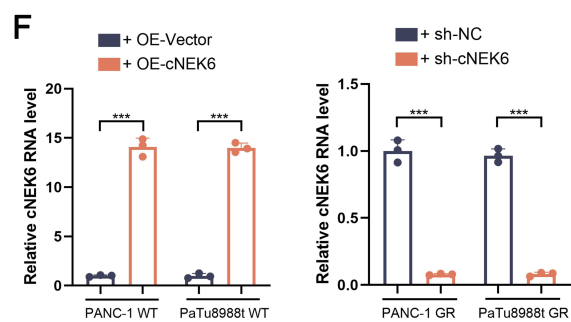

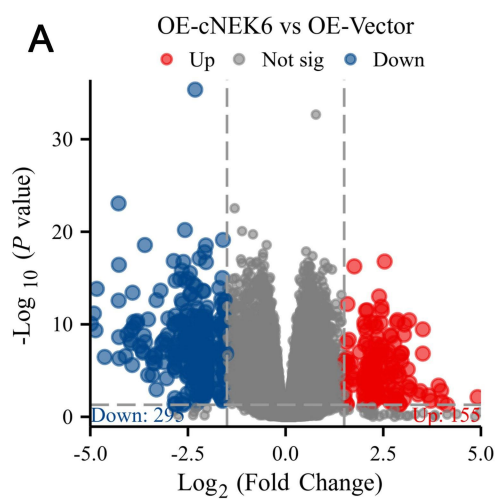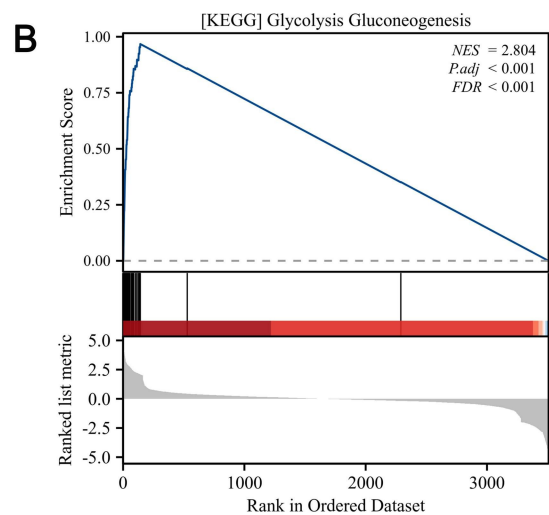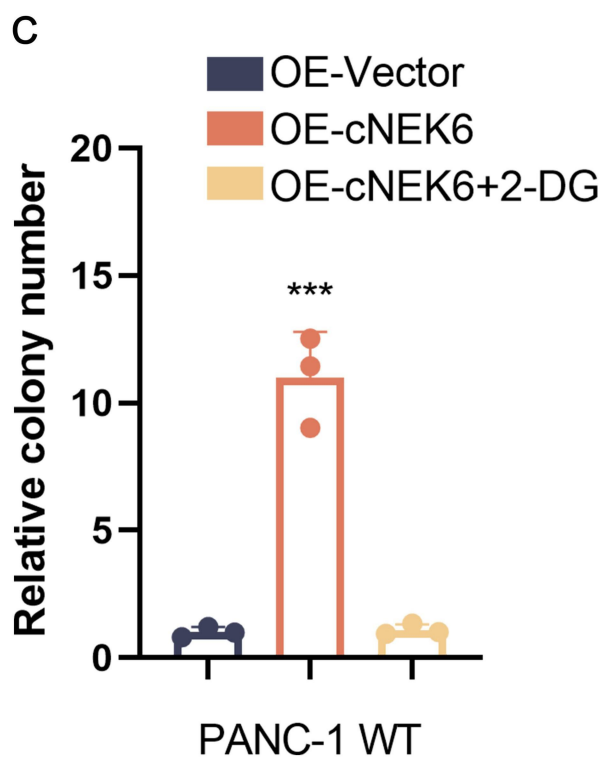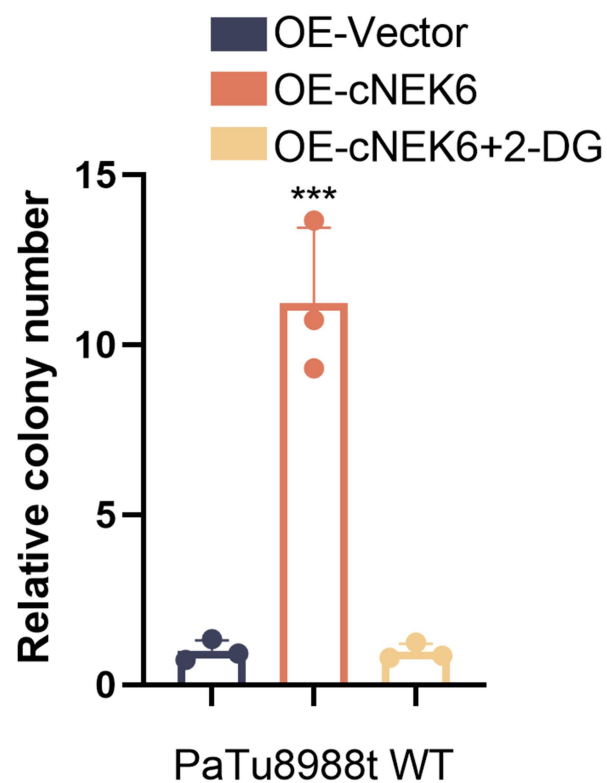

**A**

## coding\_potential\_assessment

**circBank ID:** hsa\_circNEK6\_008

**Fickett\_score:** 1.3108

**circRNA\_size:** 1953

Hexamer\_score: 0.4854

**ORF\_size:** 1923

**coding\_prob:** 0.9999

## IRES elements

| ID                        | start | end | score |
|---------------------------|-------|-----|-------|
| No matching records found |       |     |       |

No matching records found

**B**

## Sequence scan results

Your sequence:

UUCGUGCCCU CGUAGGCUG GCAUACAGGA UGGCAGGACA GCCCGGCAC AUGCCCAUG GAGGAGUUC CAACAACUC UGCCACACCC UGGGGCCUGU  
101 GCAUCCUCCU GACCCACAGA GGCAUCCCAA CACGUCUGUC UUUUCUGUCU CGCUGCGGGA UUCUCCAGAU GAAAGGAAGA UAGGCGGAGG ACAGUUCAGC  
201 GAGGUGUACA AGCCACACAG CUCUGUGGAC AGGAAGACAG UGGCUCUGAA GAAGGUGCAU AUUUUUGAGA UUAUGGACGC CAGGCGGAGG CAGGACUAGC  
301 UCAAGGAGAU CGGCCUUCUG AAGCAACUGA ACCACCCAAA UAUCAUCAAG UAUUUUGACU CGUUUAUCGA AGACAACGAG CUGAACAUUG UGCUGGAGUU  
401 GGCUGACGCA GGGGACCTUC CGCAGAUGAU CAAGUACUUU AAGAAGCAGA AGCGGUCUUA CCCGAGGAGG ACAGUAUGA AGUACUUUG GCAGCUGUGC  
501 AUGGCCGUGG AGCAACAUGA UUCACGCCGG GUGAUGCACC GAGACAUCAA GCCUGCCAA GUGUACAUA CAGCCACGGG CGUCUGAAG CUCGGUGACC  
601 UGGGUCUGGG CCGCUUUCU AGCUUCUGA CACACGCAAG CCACUCCUA G

| Score      | Relative Score | RBP Name | Start | End | Matching sequence | Matrix ID    | Download PWM | Download PFM |
|------------|----------------|----------|-------|-----|-------------------|--------------|--------------|--------------|
| 10.1470304 | 100%           | SNRPA    | 304   | 310 | AGGAGAU           | 949_10094314 | Download PWM | Download PFM |

C

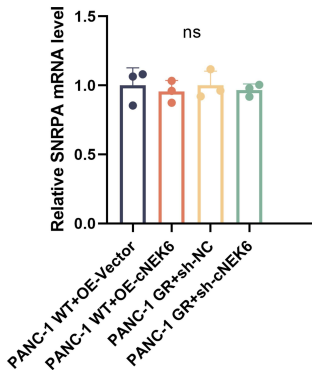

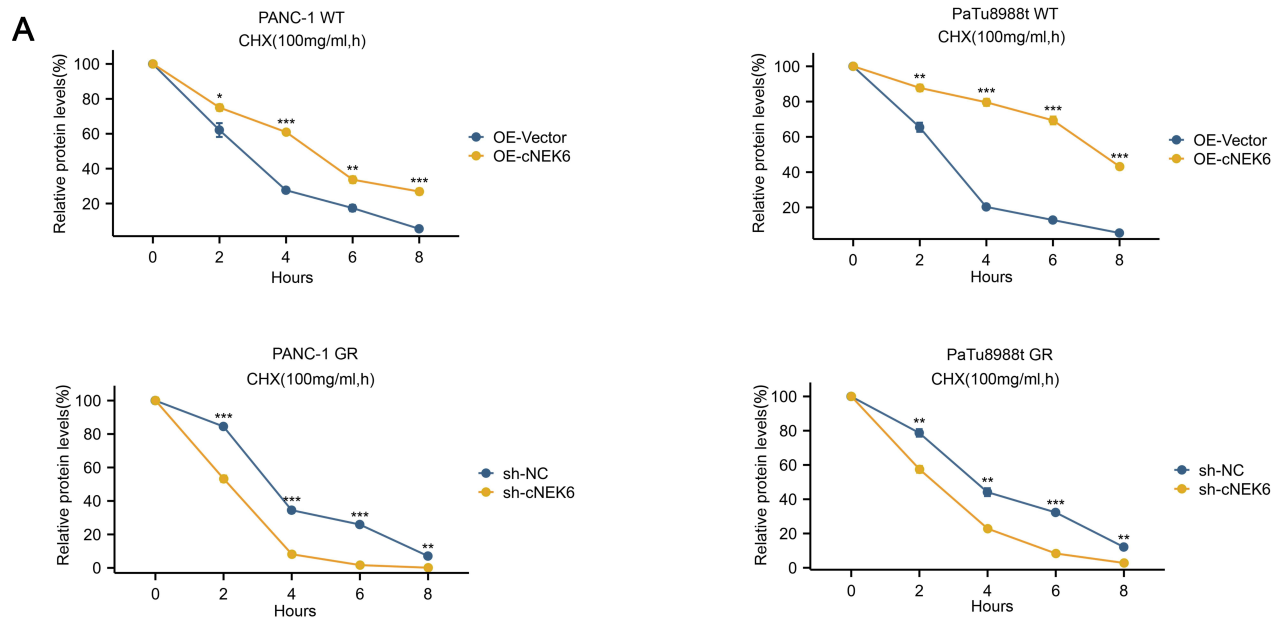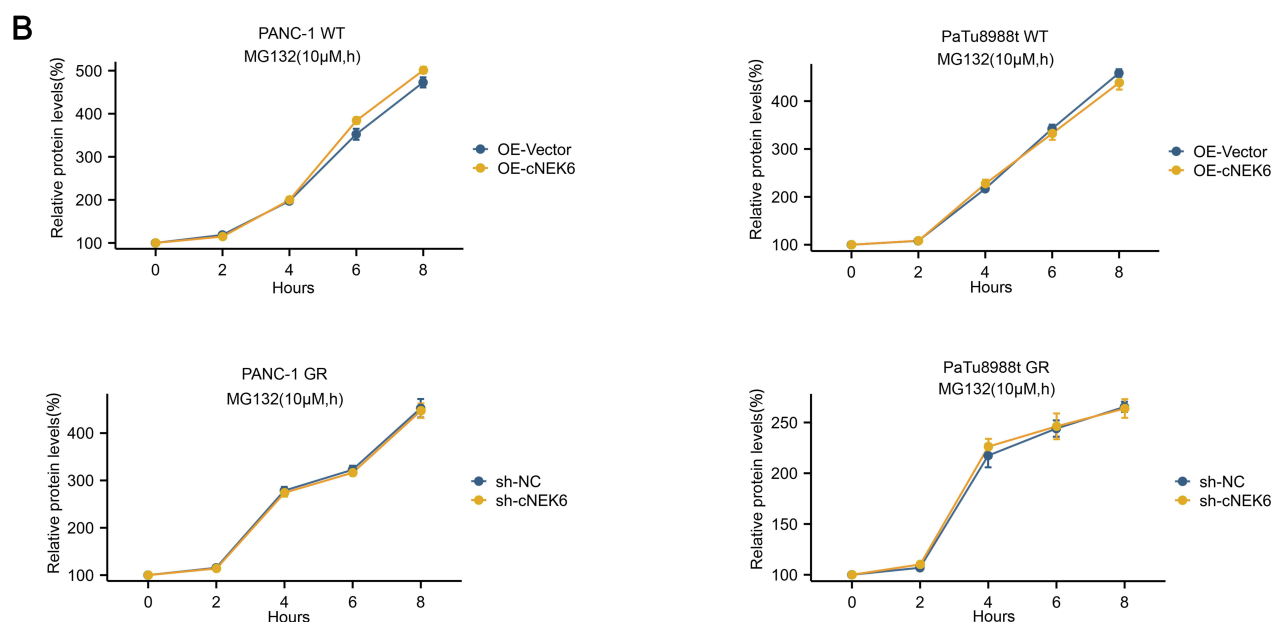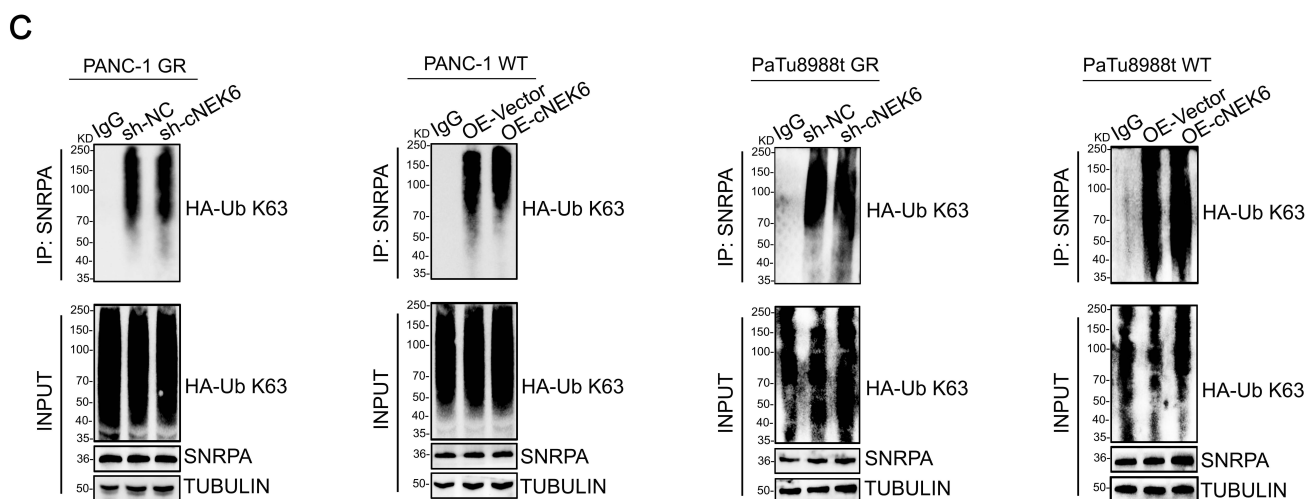

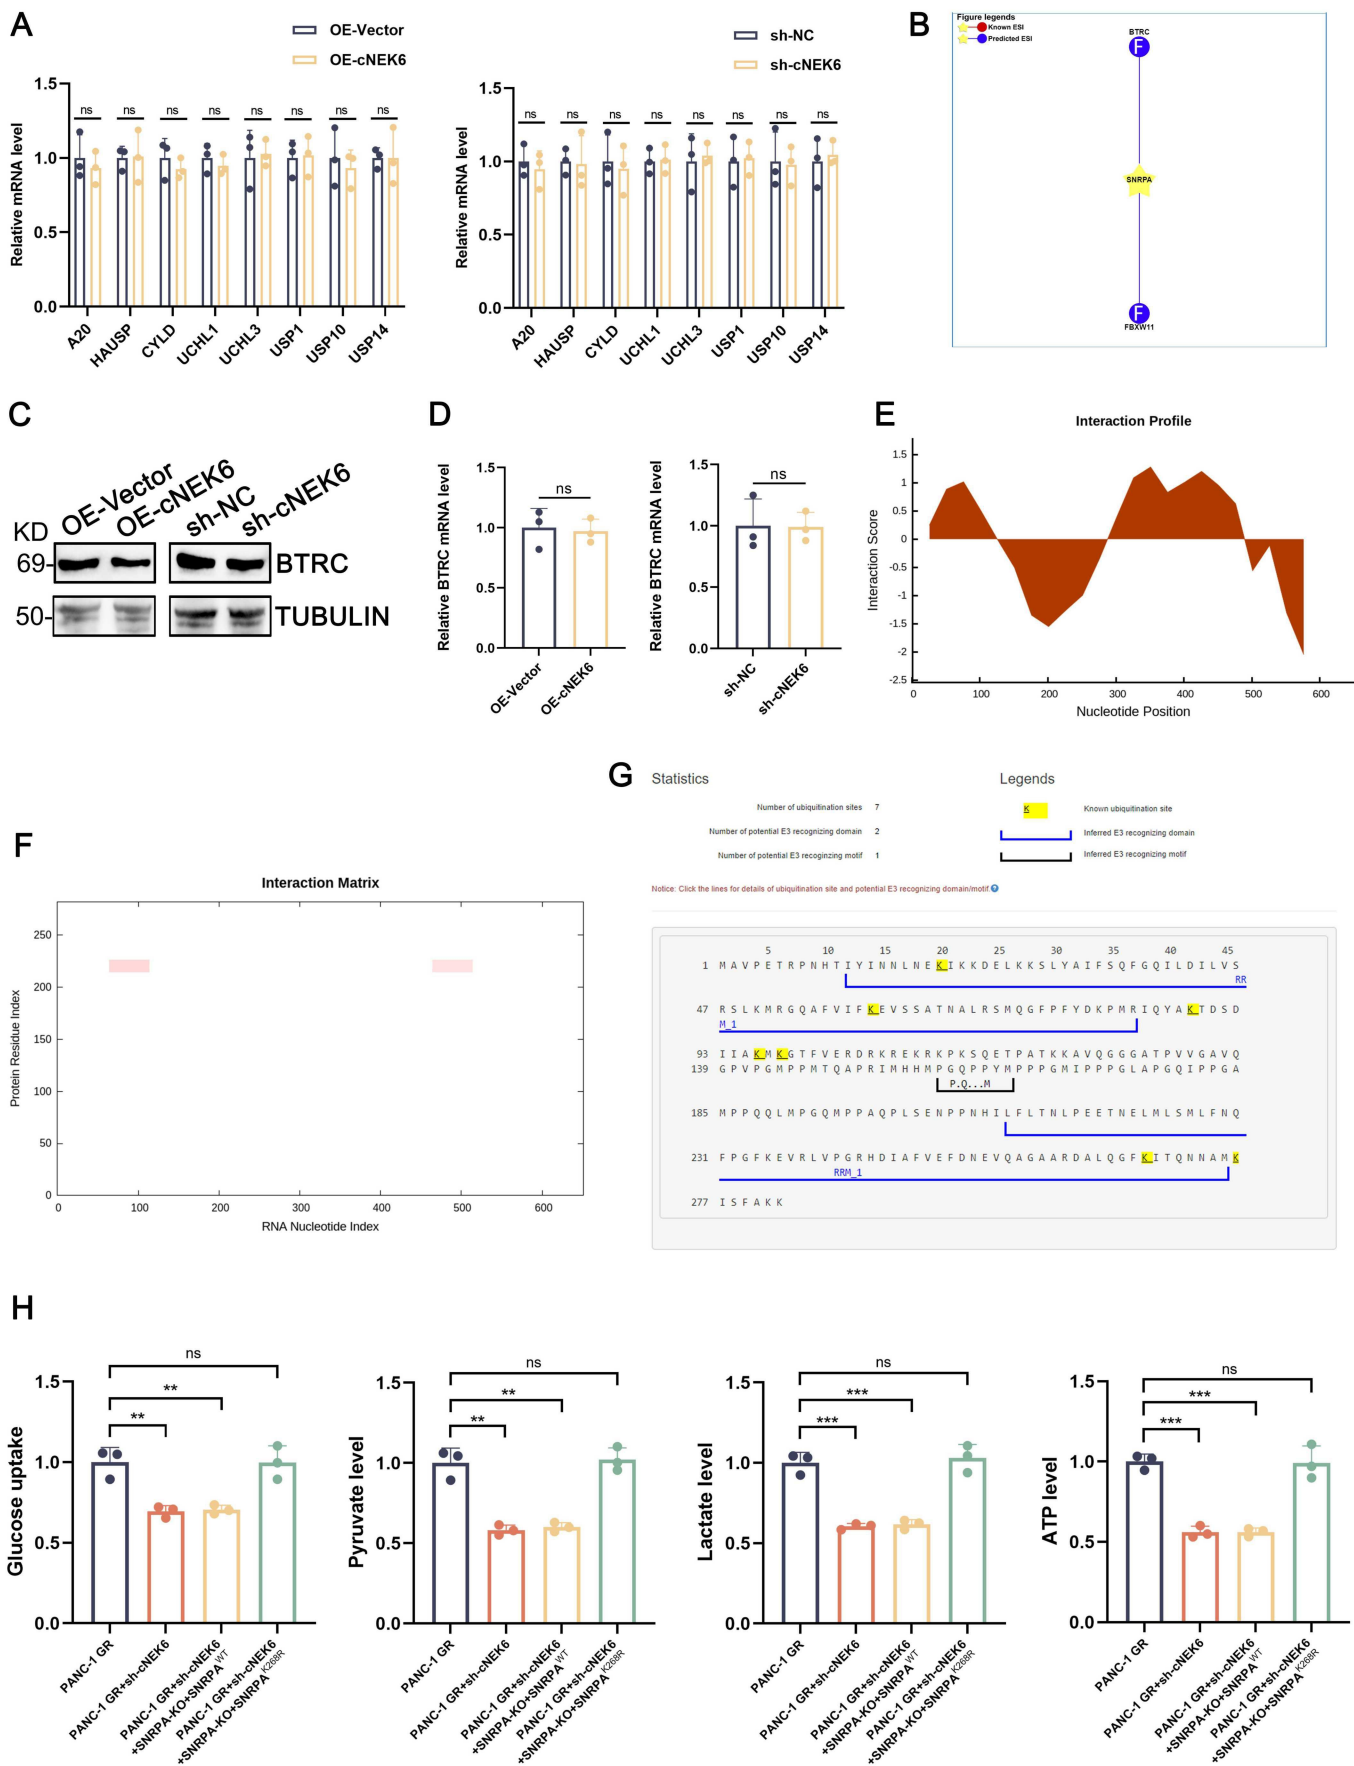

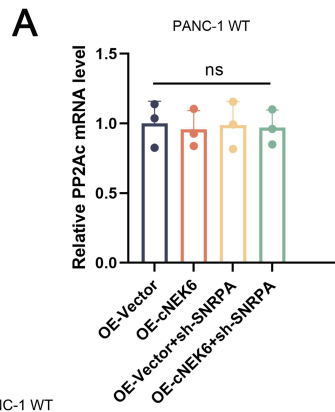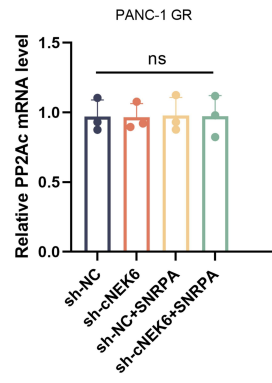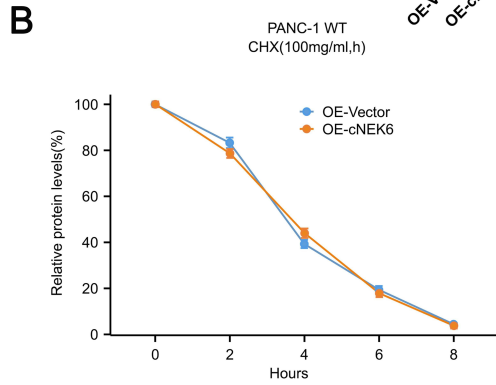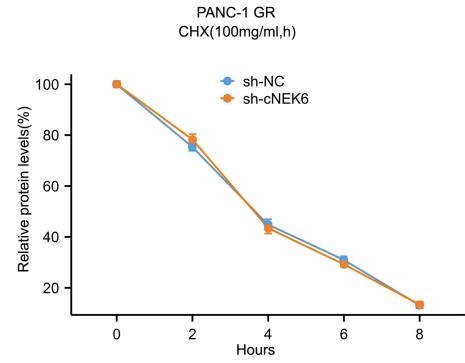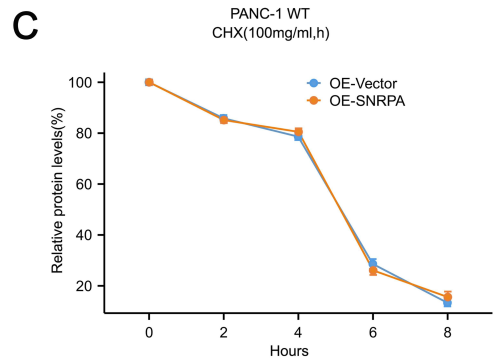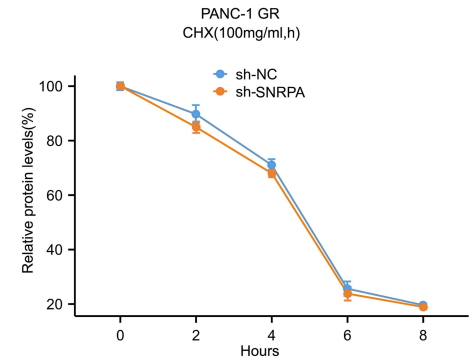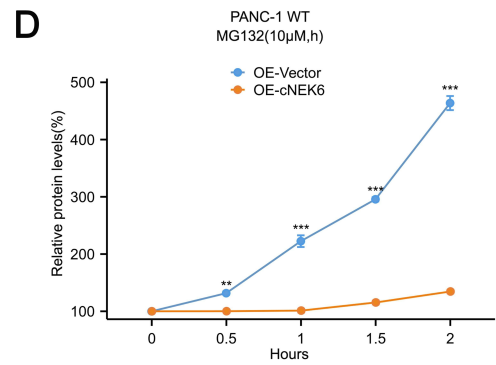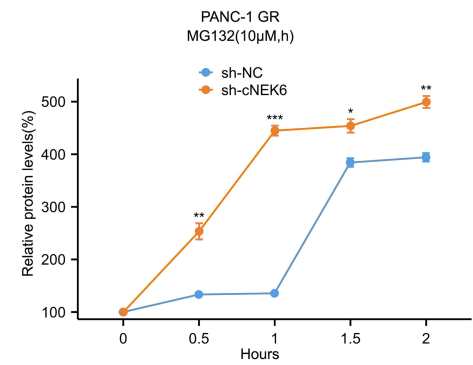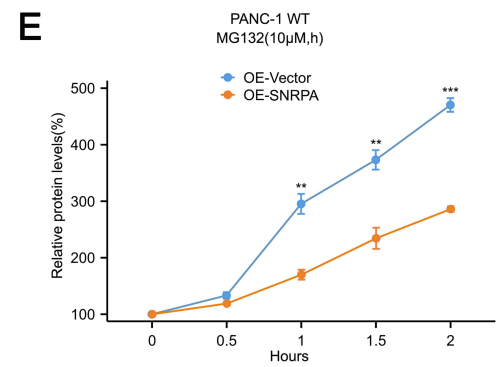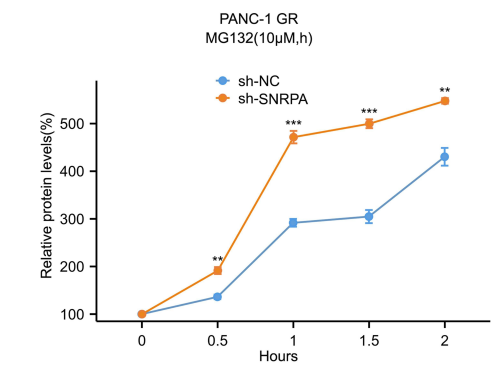



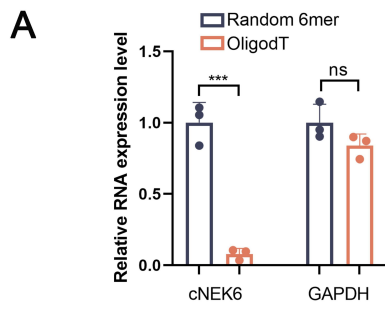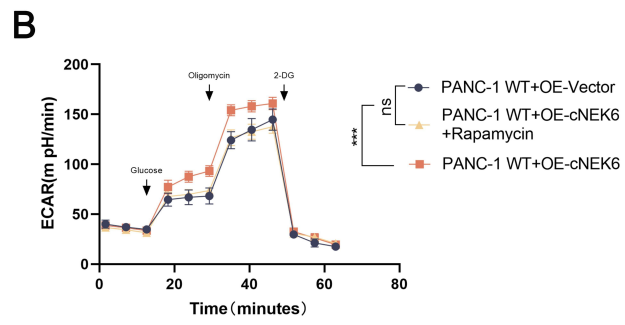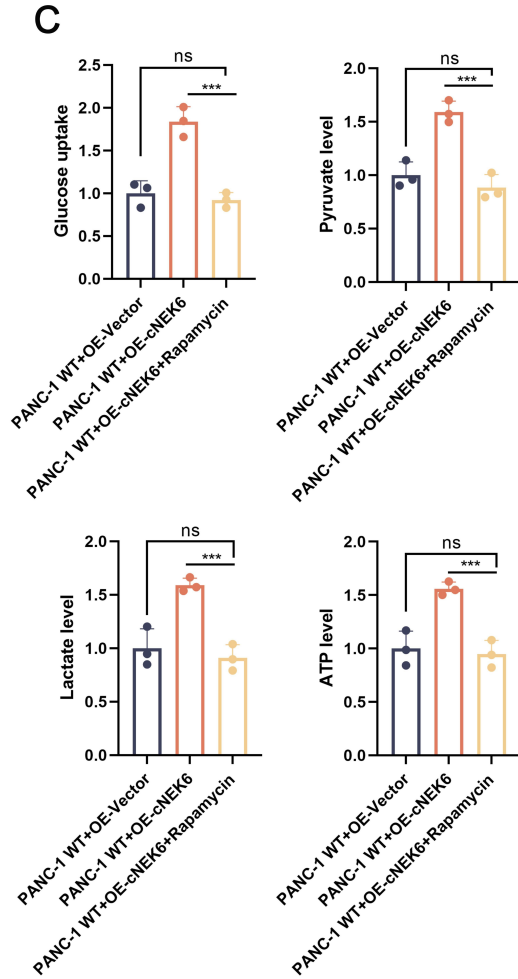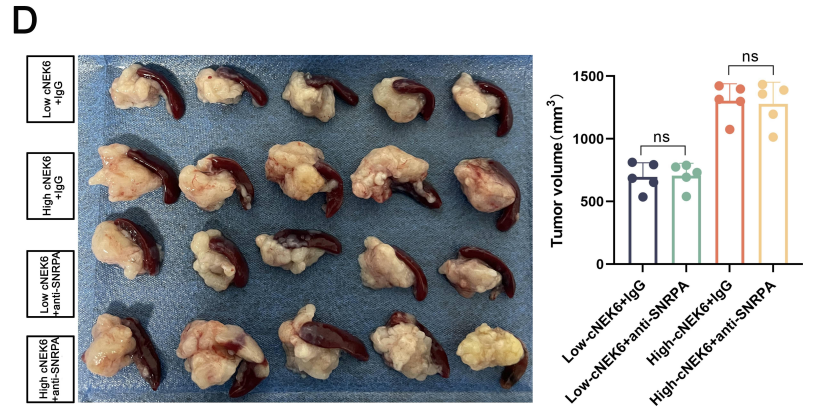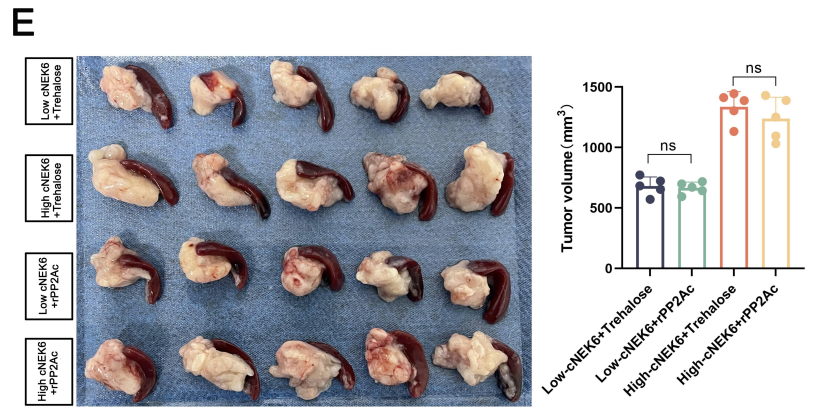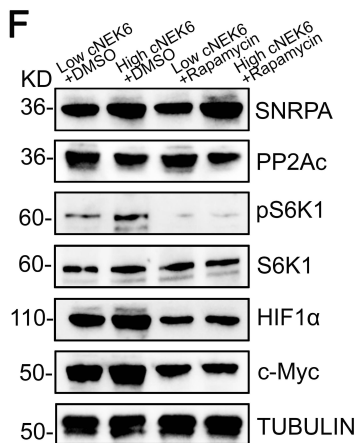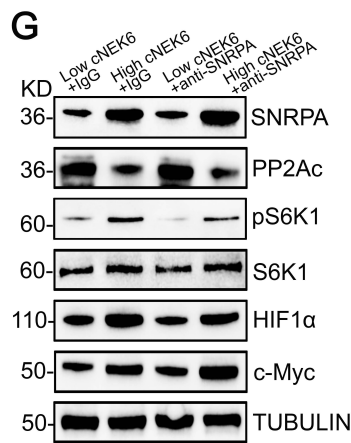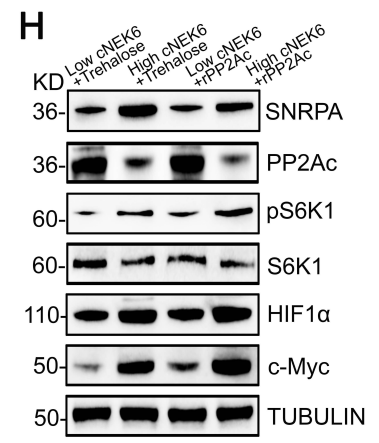

Supplement: MOESM1 [file 41419_2024_7138_MOESM1_ESM.pdf]
